# Supplementary material for: Reticulon-3 modulates the incorporation of replication competent hepatitis C virus molecules for release inside infectious exosomes
Source: PubMed Central journal article supplement (PMC7498005; doi:10.1371/journal.pone.0239153), 2020-09-17

Figure 1

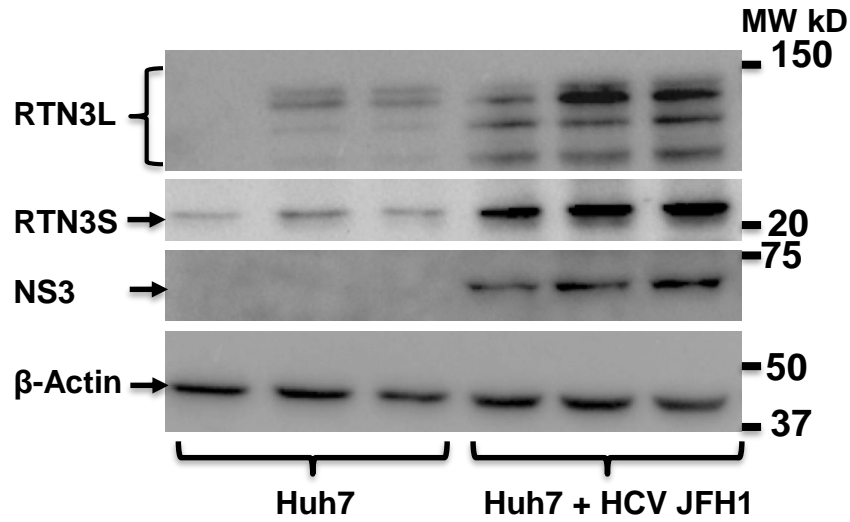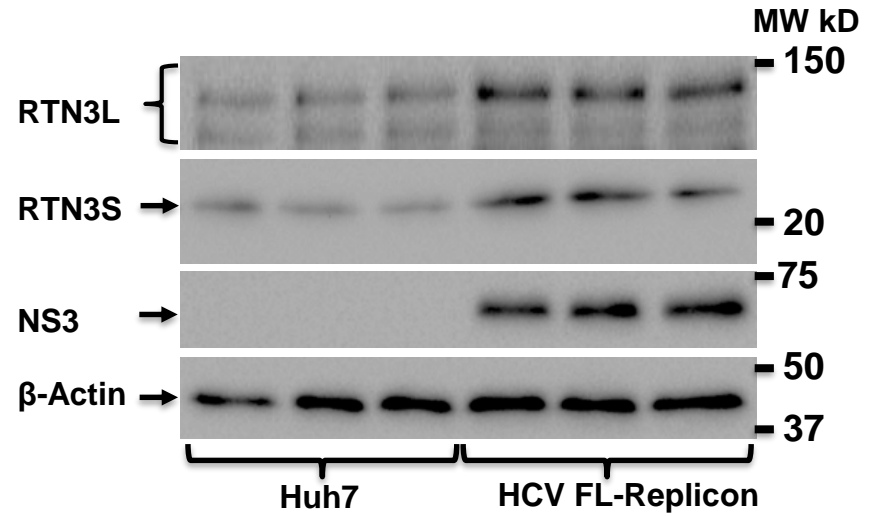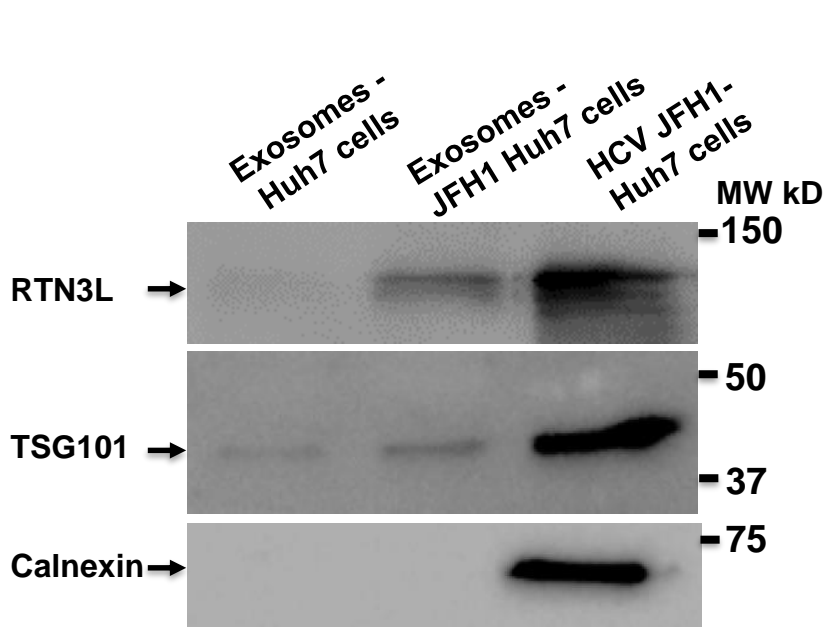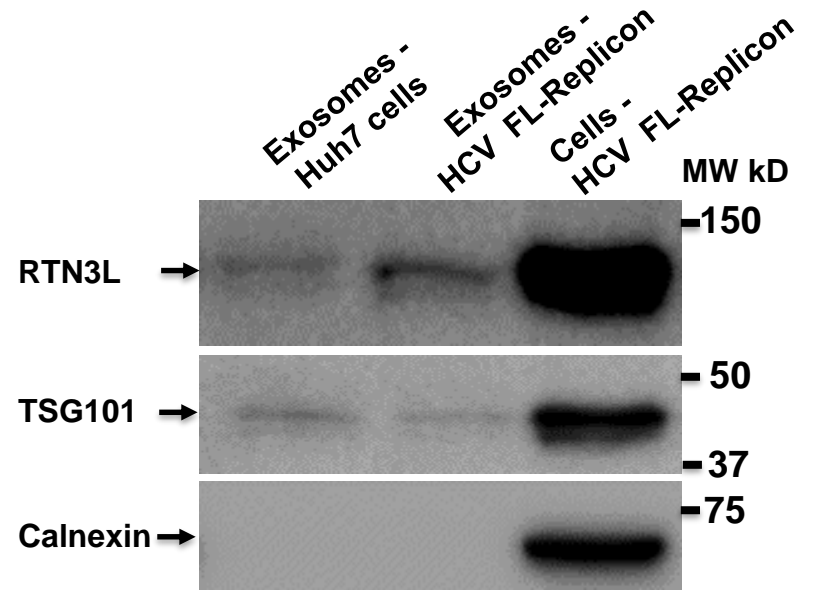

Figure 1

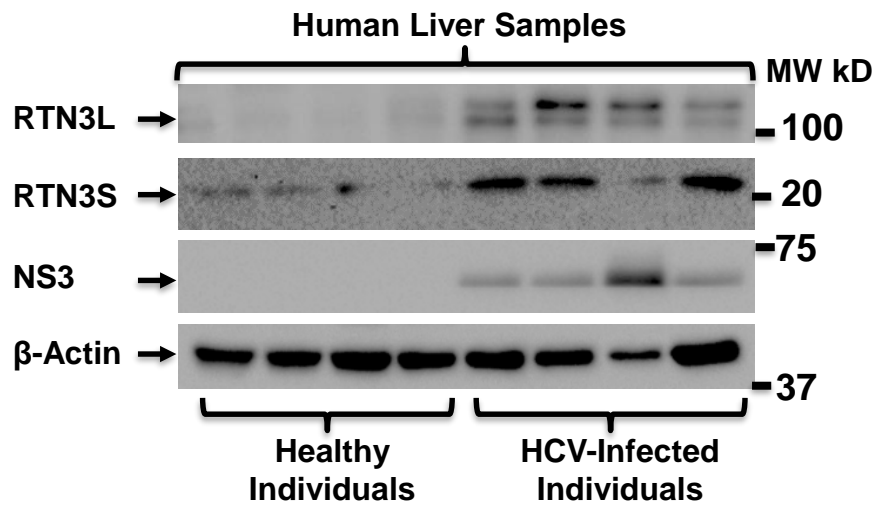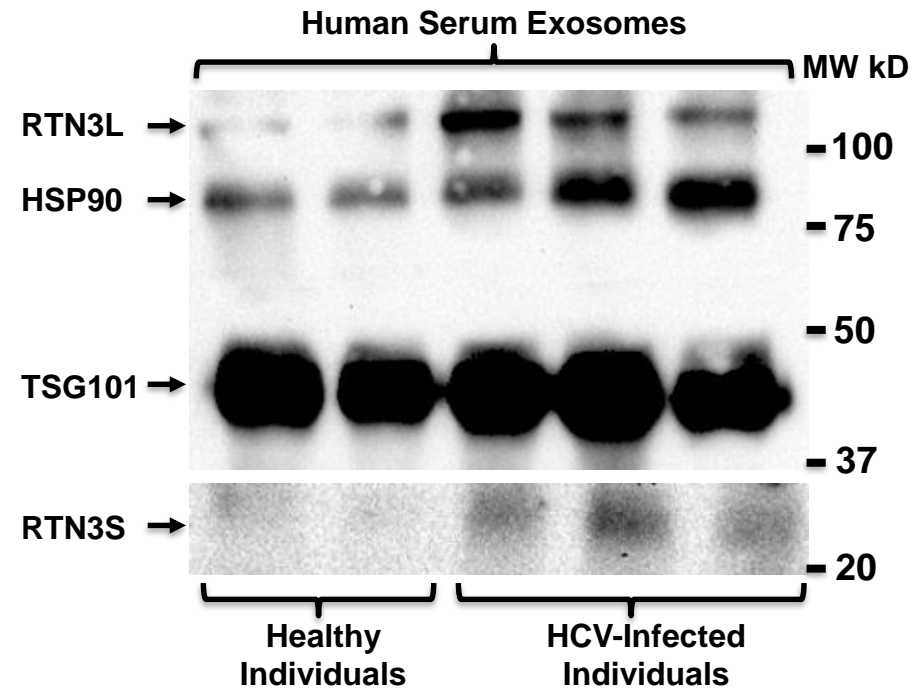

Figure 2

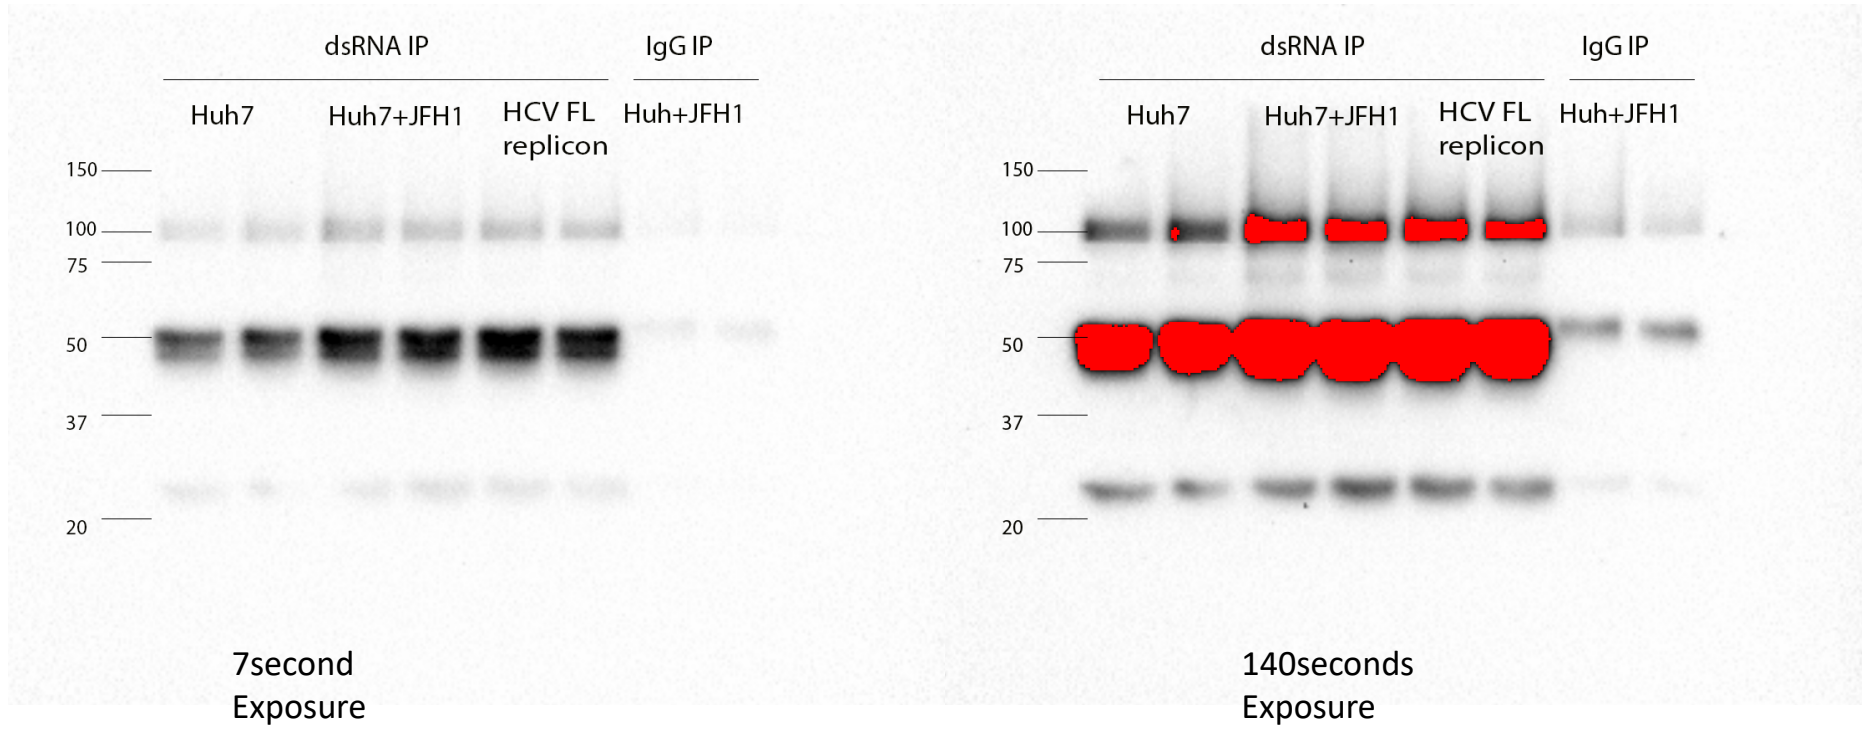

Figure 2- Actin Loading Control

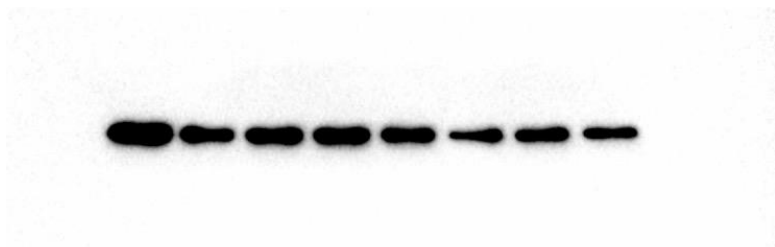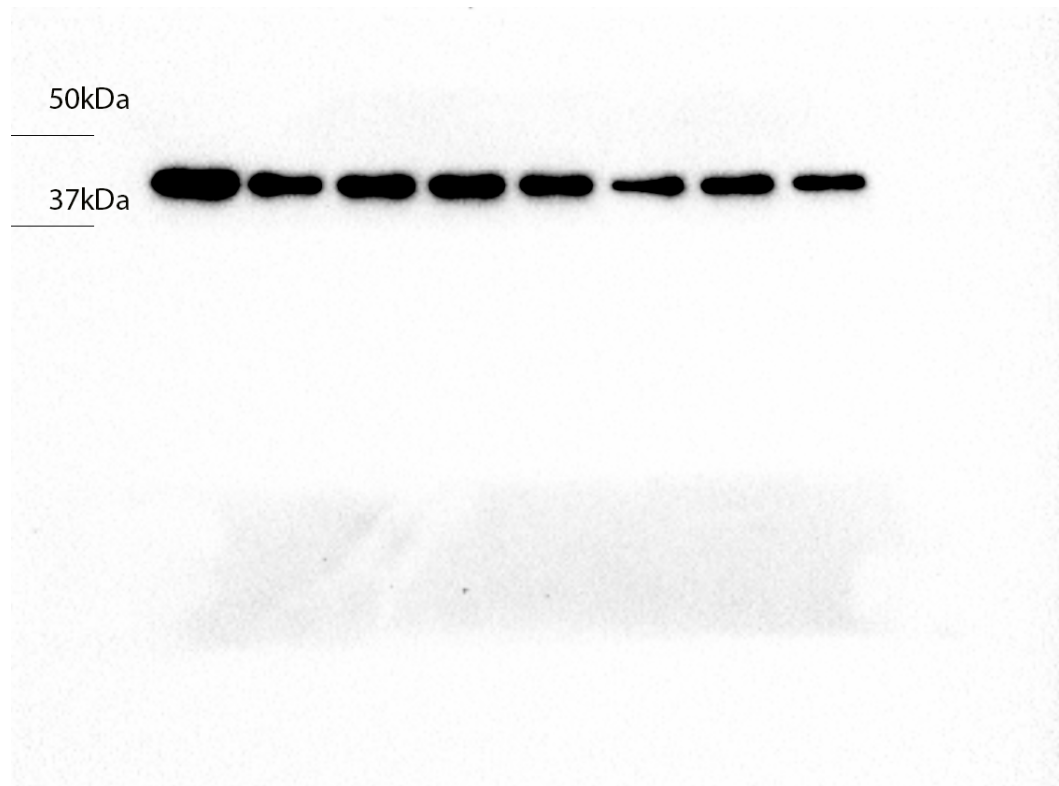

Figure 3

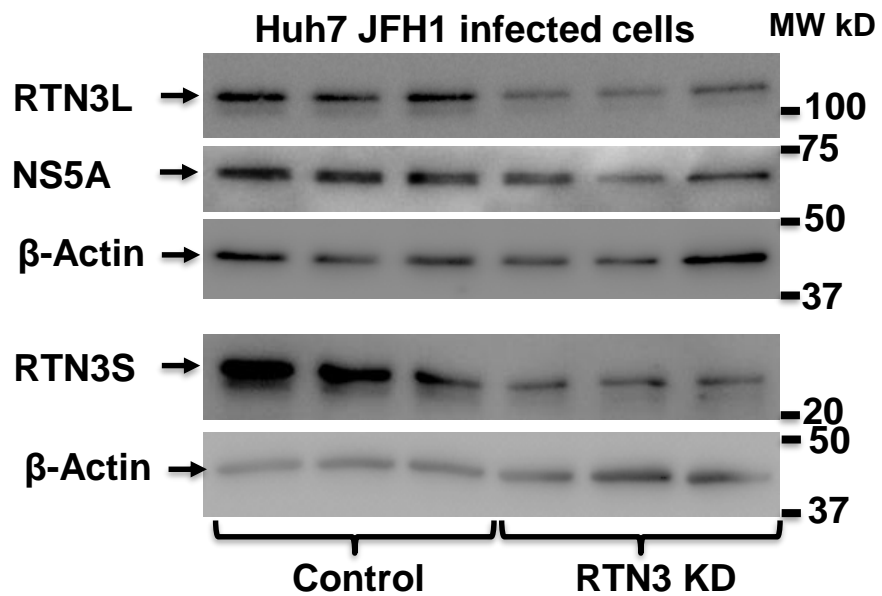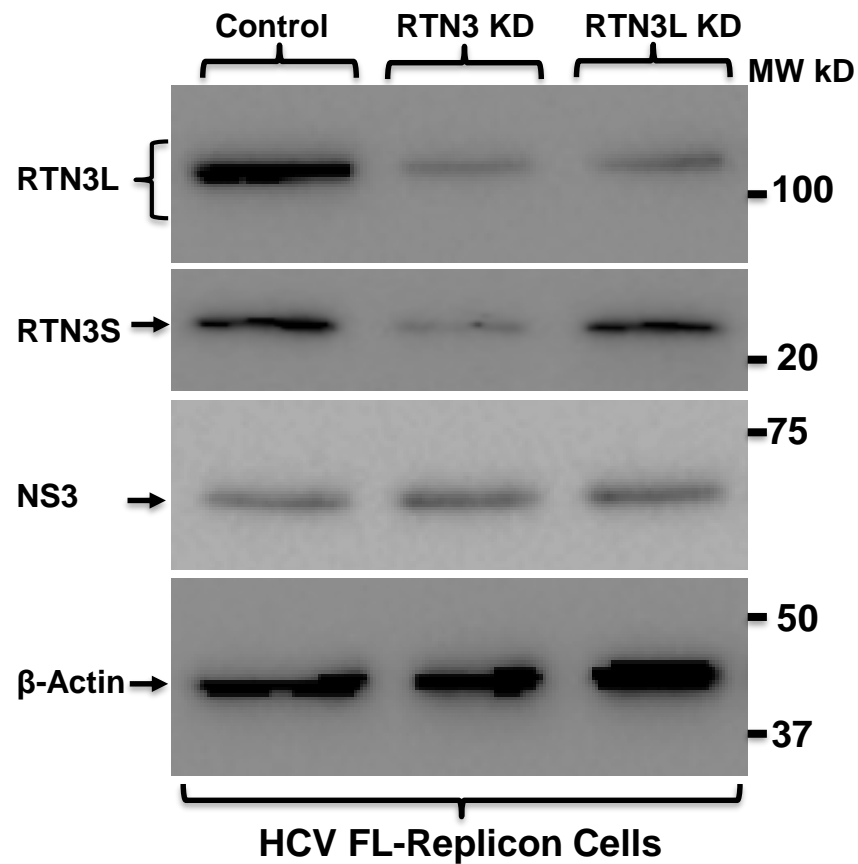

Figure 4

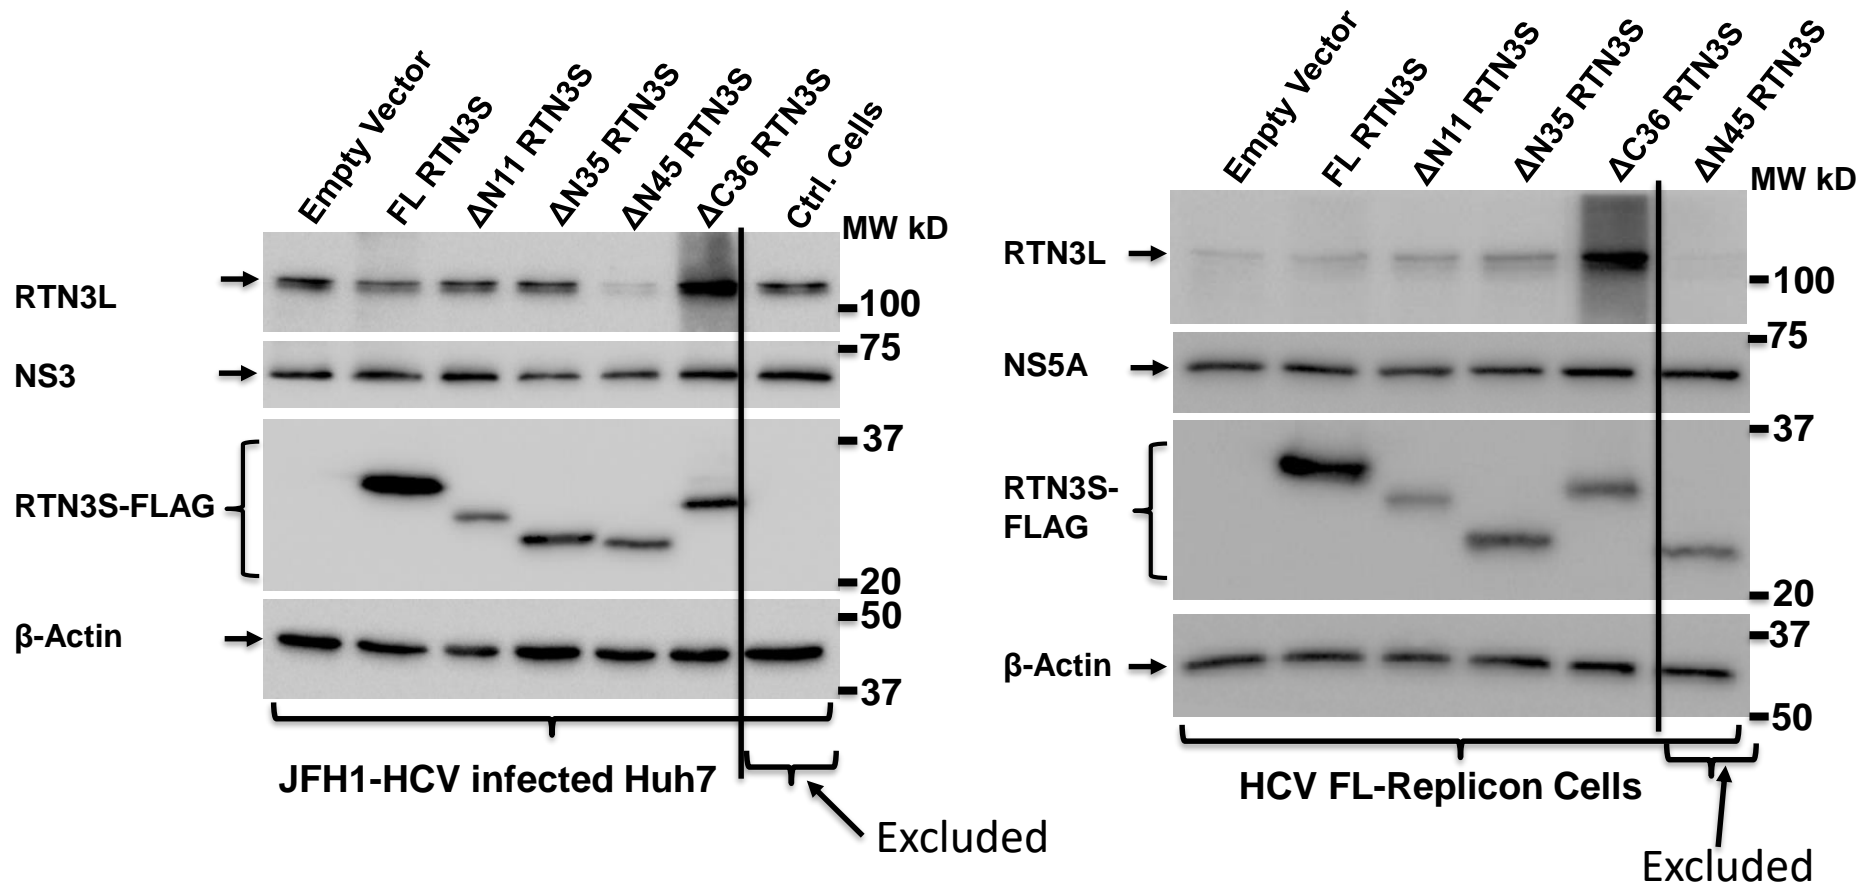

Figure 4

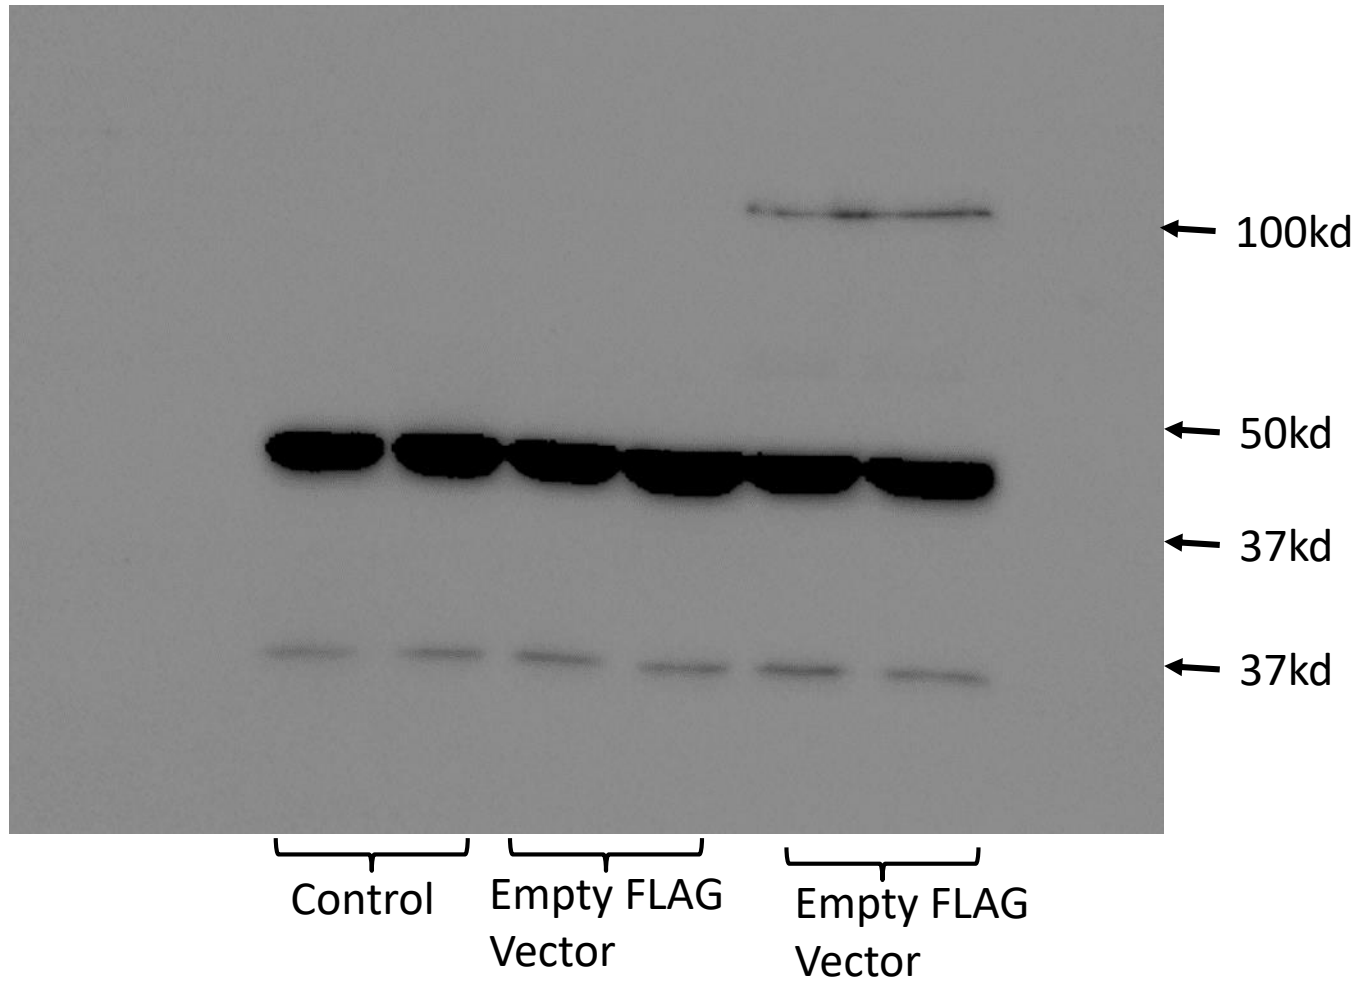

Figure 5

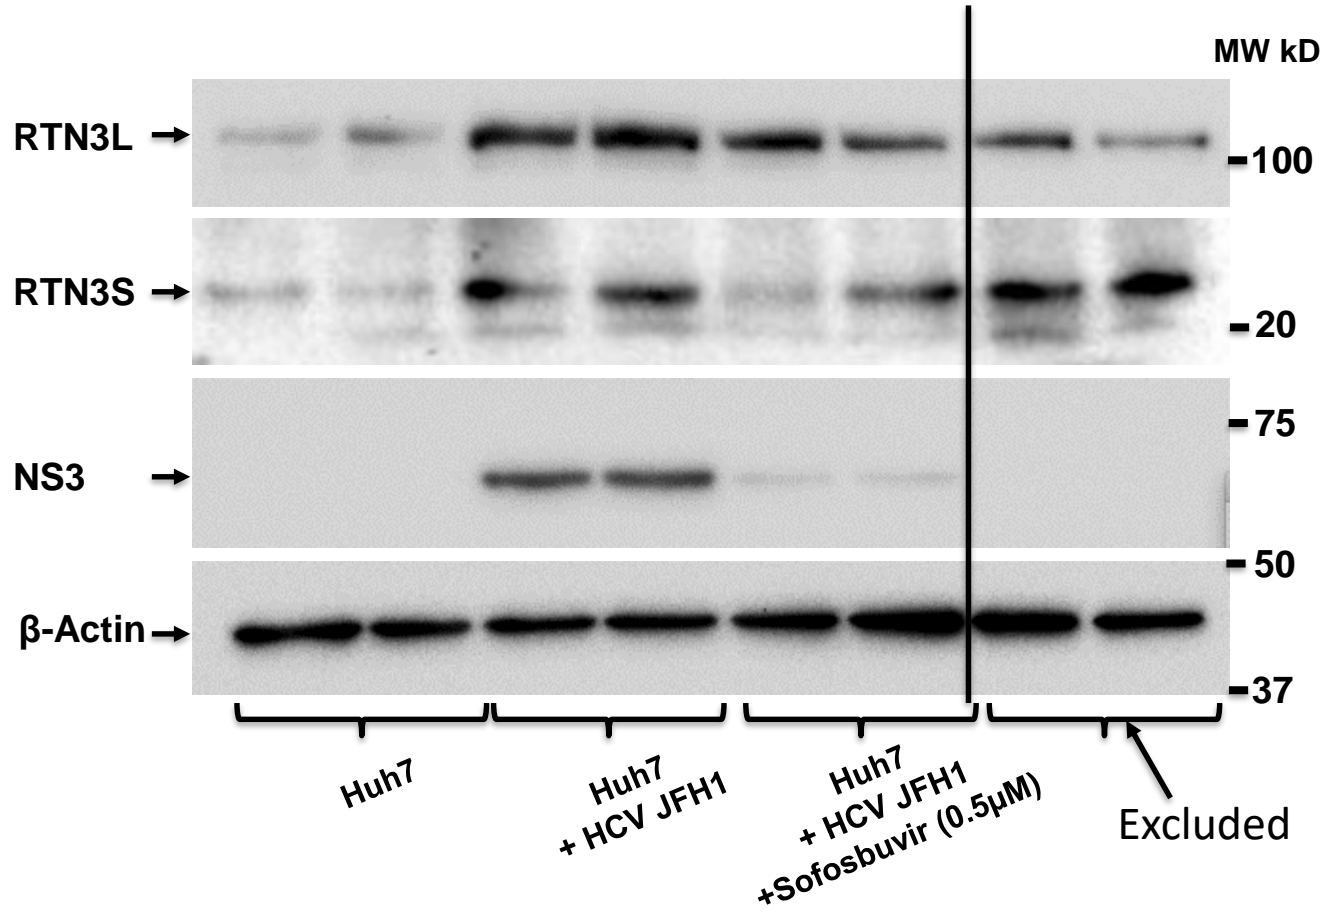



Figure 5

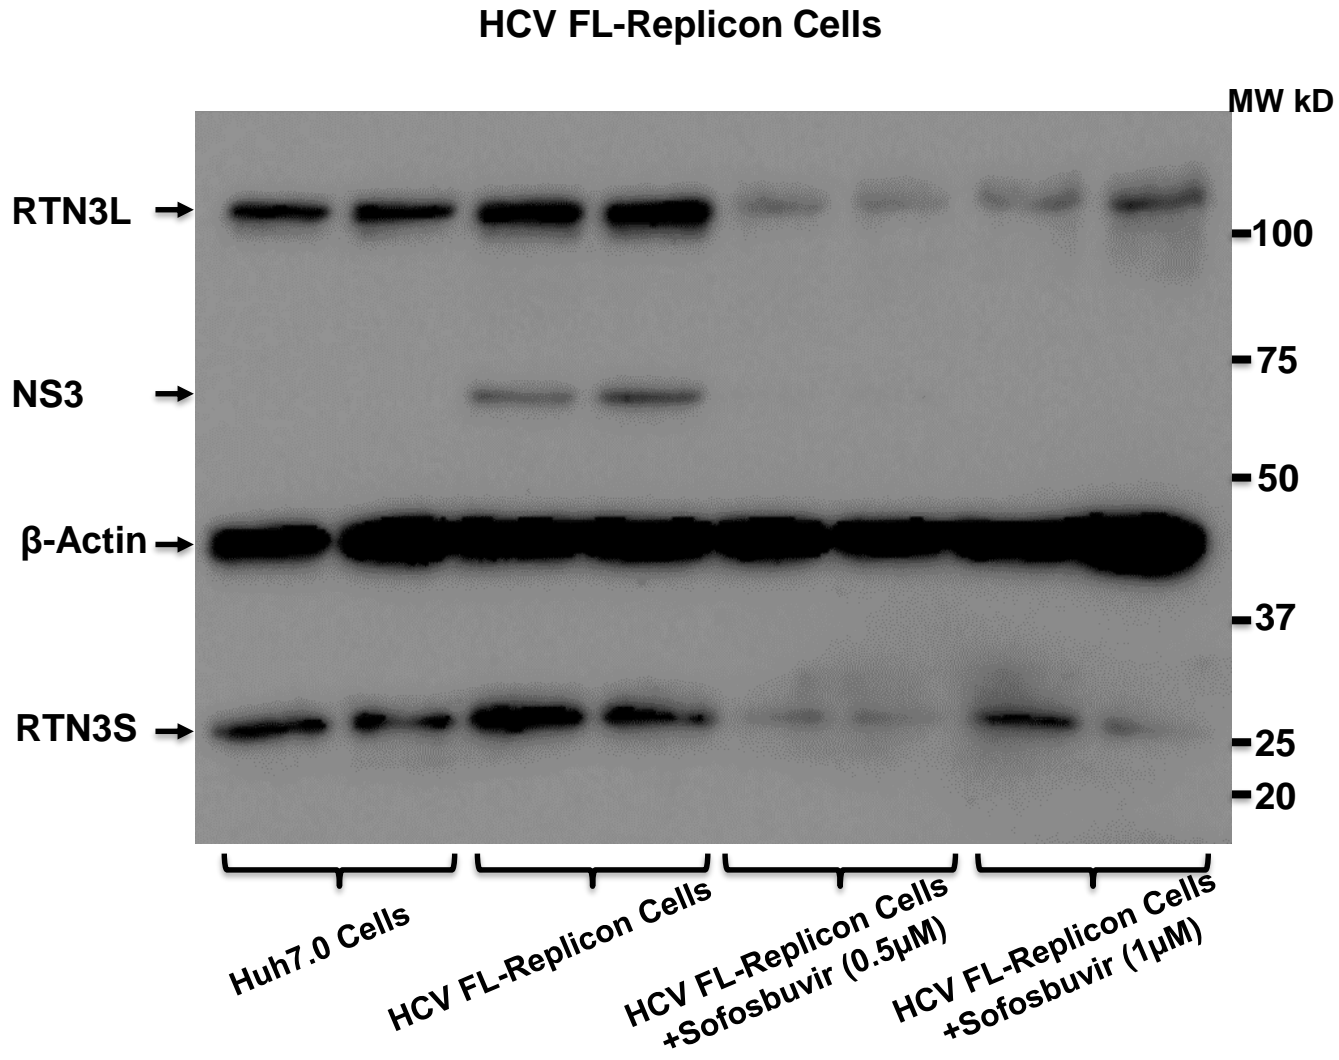

Figure 5

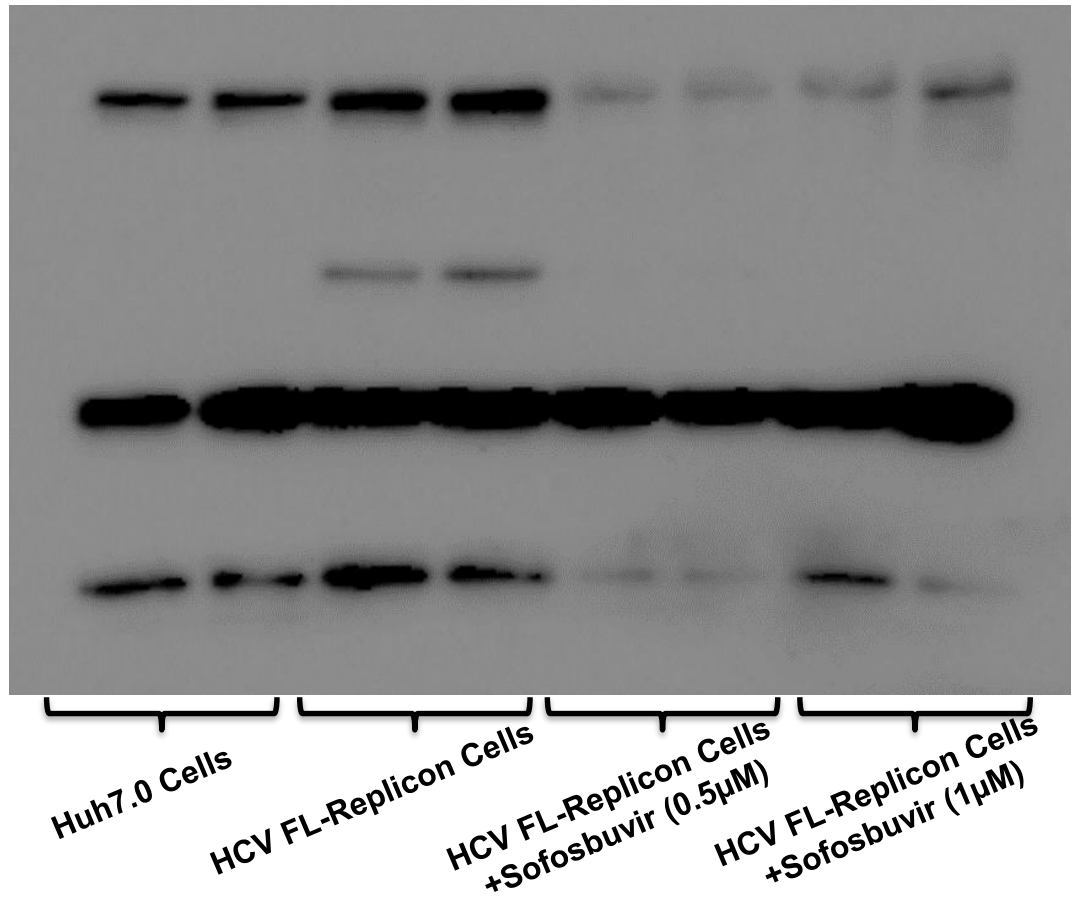

Supplement: pone.0239153.s001.pdf [file pone.0239153.s001.pdf]
